# Supplementary material for: The impact of nano-polystyrene on human serum albumin–paracetamol interactions: understanding the impact on therapeutic development and safety
Source: Royal Society of Chemistry journal article supplement (doi:10.1039/d3en00599b), 2023-12-13
Supplement: d3en00599b1.pdf [file d3en00599b1.pdf]

## Supplementary material

| Ksv                                |                                                            |                                                            |                        |                        |                                                                                                                                                      |                        |                        |                                                       |                        |                        |                                                        |                         |                        |                        |                        |
|------------------------------------|------------------------------------------------------------|------------------------------------------------------------|------------------------|------------------------|------------------------------------------------------------------------------------------------------------------------------------------------------|------------------------|------------------------|-------------------------------------------------------|------------------------|------------------------|--------------------------------------------------------|-------------------------|------------------------|------------------------|------------------------|
| Paracetamol                        | 10.85*10 <sup>2</sup>                                      | 18.85*10 <sup>2</sup>                                      | 26.73*10 <sup>2</sup>  |                        |                                                                                                                                                      |                        |                        |                                                       |                        |                        |                                                        |                         |                        |                        |                        |
| PS                                 | 26.10*10 <sup>9</sup>                                      | 26.96*10 <sup>9</sup>                                      | 28.92*10 <sup>9</sup>  |                        |                                                                                                                                                      |                        |                        |                                                       |                        |                        |                                                        |                         |                        |                        |                        |
| Paracetamol in presence of Para PS | 20 µg/mL NPS                                               |                                                            |                        | 40 µg/mL NPS           |                                                                                                                                                      |                        | 60 µg/mL NPS           |                                                       |                        | 80 µg/mL NPS           |                                                        |                         | 100 µg/mL NPS          |                        |                        |
|                                    | 81.50*10 <sup>2</sup>                                      | 90.04*10 <sup>2</sup>                                      | 92.98*10 <sup>2</sup>  | 71.06*10 <sup>2</sup>  | 80.33*10 <sup>2</sup>                                                                                                                                | 83.80*10 <sup>2</sup>  | 93.25*10 <sup>2</sup>  | 96.66*10 <sup>2</sup>                                 | 97.00*10 <sup>2</sup>  | 99.44*10 <sup>2</sup>  | 103.28*10 <sup>2</sup>                                 | 107.82*10 <sup>2</sup>  | 68.62*10 <sup>2</sup>  | 77.32*10 <sup>2</sup>  | 91.64*10 <sup>2</sup>  |
| Kq                                 |                                                            |                                                            |                        |                        |                                                                                                                                                      |                        |                        |                                                       |                        |                        |                                                        |                         |                        |                        |                        |
| Paracetamol                        | 10.86*10 <sup>11</sup>                                     | 18.85*10 <sup>11</sup>                                     | 26.73*10 <sup>11</sup> |                        |                                                                                                                                                      |                        |                        |                                                       |                        |                        |                                                        |                         |                        |                        |                        |
| PS                                 | 2.610*10 <sup>19</sup>                                     | 2.696*10 <sup>19</sup>                                     | 2.892*10 <sup>19</sup> |                        |                                                                                                                                                      |                        |                        |                                                       |                        |                        |                                                        |                         |                        |                        |                        |
| Paracetamol in presence of para PS | 20 µg/mL NPS                                               |                                                            |                        | 40 µg/mL NPS           |                                                                                                                                                      |                        | 60 µg/mL NPS           |                                                       |                        | 80 µg/mL NPS           |                                                        |                         | 100 µg/mL NPS          |                        |                        |
|                                    | 8.150*10 <sup>11</sup>                                     | 9.004*10 <sup>11</sup>                                     | 9.298*10 <sup>11</sup> | 7.106*10 <sup>11</sup> | 8.033*10 <sup>11</sup>                                                                                                                               | 8.380*10 <sup>11</sup> | 9.325*10 <sup>11</sup> | 9.666*10 <sup>11</sup>                                | 9.700*10 <sup>11</sup> | 9.944*10 <sup>11</sup> | 10.328*10 <sup>11</sup>                                | 10.782*10 <sup>11</sup> | 6.862*10 <sup>11</sup> | 7.732*10 <sup>11</sup> | 9.164*10 <sup>11</sup> |
| LB Ka                              |                                                            |                                                            |                        |                        |                                                                                                                                                      |                        |                        |                                                       |                        |                        |                                                        |                         |                        |                        |                        |
| Paracetamol                        | 4.551921822; 3.132872442; 5.35432237357469*10 <sup>3</sup> |                                                            |                        |                        |                                                                                                                                                      |                        |                        |                                                       |                        |                        |                                                        |                         |                        |                        |                        |
| PS                                 | 11.24429611; 5.798751749; 10.6179948191302*10 <sup>9</sup> |                                                            |                        |                        |                                                                                                                                                      |                        |                        |                                                       |                        |                        |                                                        |                         |                        |                        |                        |
| Paracetamol in presence of para PS | 20 µg/mL NPS                                               |                                                            |                        | 40 µg/mL NPS           |                                                                                                                                                      |                        | 60 µg/mL NPS           |                                                       |                        | 80 µg/mL NPS           |                                                        |                         | 100 µg/mL NPS          |                        |                        |
|                                    | 5.277723495; 6.195815688; 2.07664142611306*10 <sup>3</sup> | 12.59097410; 14.39661043; 11.2539055704624*10 <sup>3</sup> |                        |                        | 020.8809456; 023.5698940; 037.41588817621; 021.7499952; 028.71401618; 031.61717336421; 052.9759303; 051.874205335; 055.8351210212859*10 <sup>3</sup> |                        |                        |                                                       |                        |                        |                                                        |                         |                        |                        |                        |
| DL n                               |                                                            |                                                            |                        |                        |                                                                                                                                                      |                        |                        |                                                       |                        |                        |                                                        |                         |                        |                        |                        |
| Paracetamol                        | 1.78819022                                                 | 1.73021132                                                 | 1.791749338            |                        |                                                                                                                                                      |                        |                        |                                                       |                        |                        |                                                        |                         |                        |                        |                        |
| PS                                 | 0.56023568                                                 | 0.57756137                                                 | 0.445772612            |                        |                                                                                                                                                      |                        |                        |                                                       |                        |                        |                                                        |                         |                        |                        |                        |
| Paracetamol in presence of para PS | 20 µg/mL NPS                                               |                                                            |                        | 40 µg/mL NPS           |                                                                                                                                                      |                        | 60 µg/mL NPS           |                                                       |                        | 80 µg/mL NPS           |                                                        |                         | 100 µg/mL NPS          |                        |                        |
|                                    | 0.80279504                                                 | 0.76390832                                                 | 0.501925209            | 0.65938781             | 0.61320849                                                                                                                                           | 0.61385452             | 0.50155226             | 0.47639489                                            | 0.36786548             | 0.48907587             | 0.439646554                                            | 0.406802014             | 0.28182517             | 0.292810682            | 0.29270159             |
| Ka                                 |                                                            |                                                            |                        |                        |                                                                                                                                                      |                        |                        |                                                       |                        |                        |                                                        |                         |                        |                        |                        |
| Paracetamol                        | 8.365328499; 5.220222329; 24.48595235*10 <sup>5</sup>      |                                                            |                        |                        |                                                                                                                                                      |                        |                        |                                                       |                        |                        |                                                        |                         |                        |                        |                        |
| PS                                 | 1.238268999; 5.3440683; 2.007335661*10 <sup>4</sup>        |                                                            |                        |                        |                                                                                                                                                      |                        |                        |                                                       |                        |                        |                                                        |                         |                        |                        |                        |
| Paracetamol in presence of para PS | 20 µg/mL NPS                                               |                                                            |                        | 40 µg/mL NPS           |                                                                                                                                                      |                        | 60 µg/mL NPS           |                                                       |                        | 80 µg/mL NPS           |                                                        |                         | 100 µg/mL NPS          |                        |                        |
|                                    | 1.56020261; 1.309456271; 1.670086633*10 <sup>1</sup>       | 3.946866252; 3.17087411; 4.675833089*10 <sup>1</sup>       |                        |                        | 1.70533223; 1.4516603; 1.6854661293*10 <sup>1</sup>                                                                                                  |                        |                        | 1.673119651; 1.166361028; 1.011372172*10 <sup>1</sup> |                        |                        | 2.826682303; 3.327905611*1; 1.35427855*10 <sup>0</sup> |                         |                        |                        |                        |
| VH                                 |                                                            |                                                            |                        |                        |                                                                                                                                                      |                        |                        |                                                       |                        |                        |                                                        |                         |                        |                        |                        |
|                                    | ΔG 298.15                                                  |                                                            |                        | ΔG 303.15              |                                                                                                                                                      |                        | ΔG 310.15              |                                                       |                        |                        |                                                        |                         |                        |                        |                        |
| PS                                 | -40103.1972                                                | -33915.3713                                                | -25252.41501           |                        |                                                                                                                                                      |                        |                        |                                                       |                        |                        |                                                        |                         |                        |                        |                        |
| para                               | -30.8993174                                                | -32.6298895                                                | -35.05269049           |                        |                                                                                                                                                      |                        |                        |                                                       |                        |                        |                                                        |                         |                        |                        |                        |
| 20 µg/mL NPS                       | -13.2496925                                                | -10.9895972                                                | -7.825463819           |                        |                                                                                                                                                      |                        |                        |                                                       |                        |                        |                                                        |                         |                        |                        |                        |
| 40 µg/mL NPS                       | -9.11091696                                                | -8.71195778                                                | -8.153414916           |                        |                                                                                                                                                      |                        |                        |                                                       |                        |                        |                                                        |                         |                        |                        |                        |
| 60 µg/mL NPS                       | -7.24489959                                                | -6.36331378                                                | -5.129093638           |                        |                                                                                                                                                      |                        |                        |                                                       |                        |                        |                                                        |                         |                        |                        |                        |
| 80 µg/mL NPS                       | -6.84588725                                                | -6.43518286                                                | -5.860196719           |                        |                                                                                                                                                      |                        |                        |                                                       |                        |                        |                                                        |                         |                        |                        |                        |
| paracetamol in presence of para PS | 100 µg/mL NPS                                              | -3.02465605                                                | -2.23479215            | -1.128982692           | paracetamol in presence of                                                                                                                           | 100 µg/mL NPS          | -50.1242403            | -0.1579728                                            |                        |                        |                                                        |                         |                        |                        |                        |
|                                    | KJ/mol <sup>-1</sup>                                       |                                                            |                        | KJ/mol <sup>-1</sup>   |                                                                                                                                                      |                        | KJ/mol <sup>-1</sup>   |                                                       |                        |                        |                                                        |                         |                        |                        |                        |
|                                    | ΔH                                                         |                                                            |                        | ΔS                     |                                                                                                                                                      |                        |                        |                                                       |                        |                        |                                                        |                         |                        |                        |                        |
| PS                                 | -409.083257                                                | -1.2375652                                                 |                        |                        |                                                                                                                                                      |                        |                        |                                                       |                        |                        |                                                        |                         |                        |                        |                        |
| para                               | -72.214                                                    | 0.346                                                      |                        |                        |                                                                                                                                                      |                        |                        |                                                       |                        |                        |                                                        |                         |                        |                        |                        |
| 20 µg/mL NPS                       | -148.019174                                                | -0.4520191                                                 |                        |                        |                                                                                                                                                      |                        |                        |                                                       |                        |                        |                                                        |                         |                        |                        |                        |
| 40 µg/mL NPS                       | -32.9008532                                                | -0.0797918                                                 |                        |                        |                                                                                                                                                      |                        |                        |                                                       |                        |                        |                                                        |                         |                        |                        |                        |
| 60 µg/mL NPS                       | -59.8138617                                                | -0.1763172                                                 |                        |                        |                                                                                                                                                      |                        |                        |                                                       |                        |                        |                                                        |                         |                        |                        |                        |
| 80 µg/mL NPS                       | -31.3361898                                                | -0.0821409                                                 |                        |                        |                                                                                                                                                      |                        |                        |                                                       |                        |                        |                                                        |                         |                        |                        |                        |
| paracetamol in presence of para PS | 100 µg/mL NPS                                              | -50.1242403                                                | -0.1579728             |                        |                                                                                                                                                      |                        |                        |                                                       |                        |                        |                                                        |                         |                        |                        |                        |
|                                    | KJ/mol <sup>-1</sup>                                       |                                                            |                        | KJ/mol <sup>-1</sup>   |                                                                                                                                                      |                        | KJ/mol <sup>-1</sup>   |                                                       |                        | KJ/mol <sup>-1</sup>   |                                                        |                         |                        |                        |                        |

Table.1 The analysed fluorescence data; ster volmer, double log, vant hoff's, ΔG, ΔH and ΔS

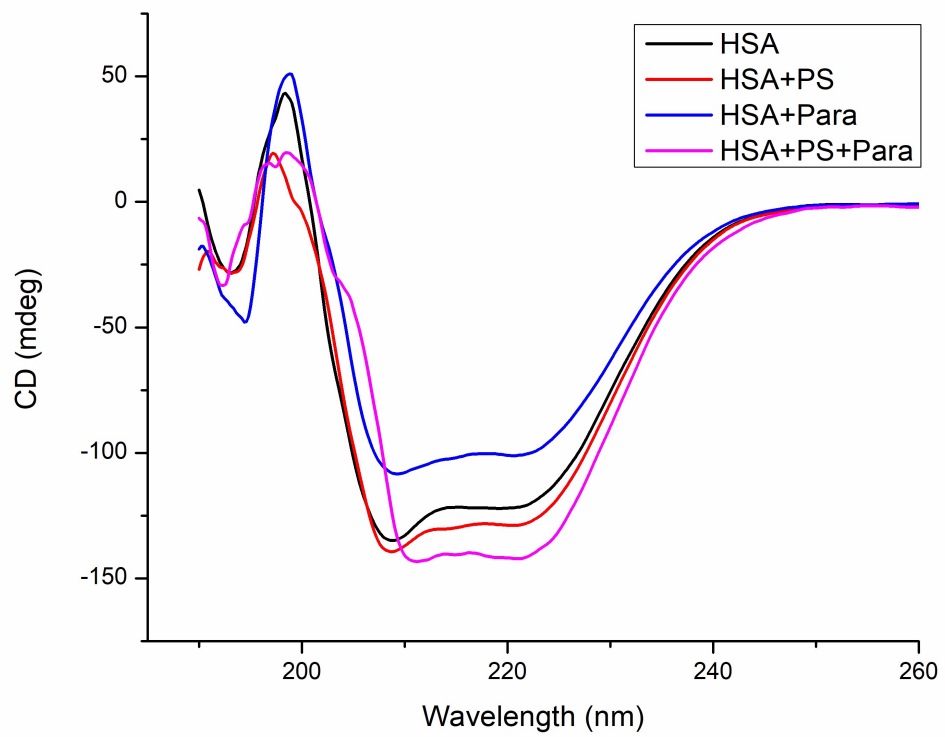

**Fig.1 CD spectrum of control, NPS, paracetamol, NPS-paracetamol interacted HSA**

# BeStSel analysis result of CD spectrum

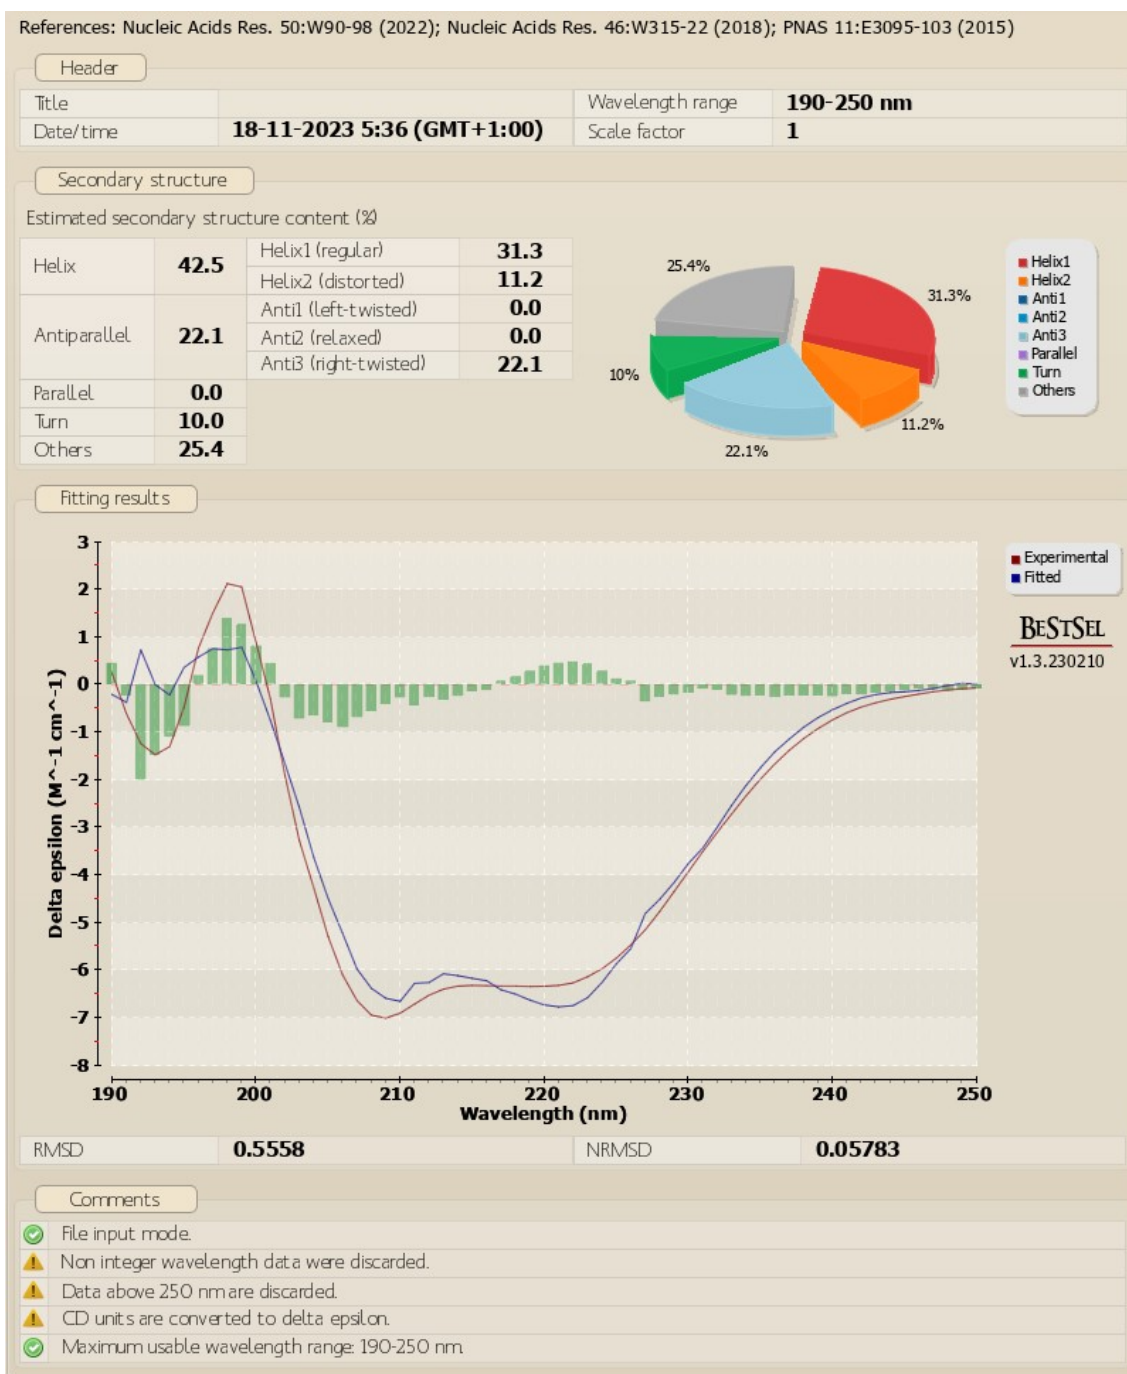

Fig.2 Control. Untreated HSA

References: Nucleic Acids Res. 50:W90-98 (2022); Nucleic Acids Res. 46:W315-22 (2018); PNAS 11:E3095-103 (2015)

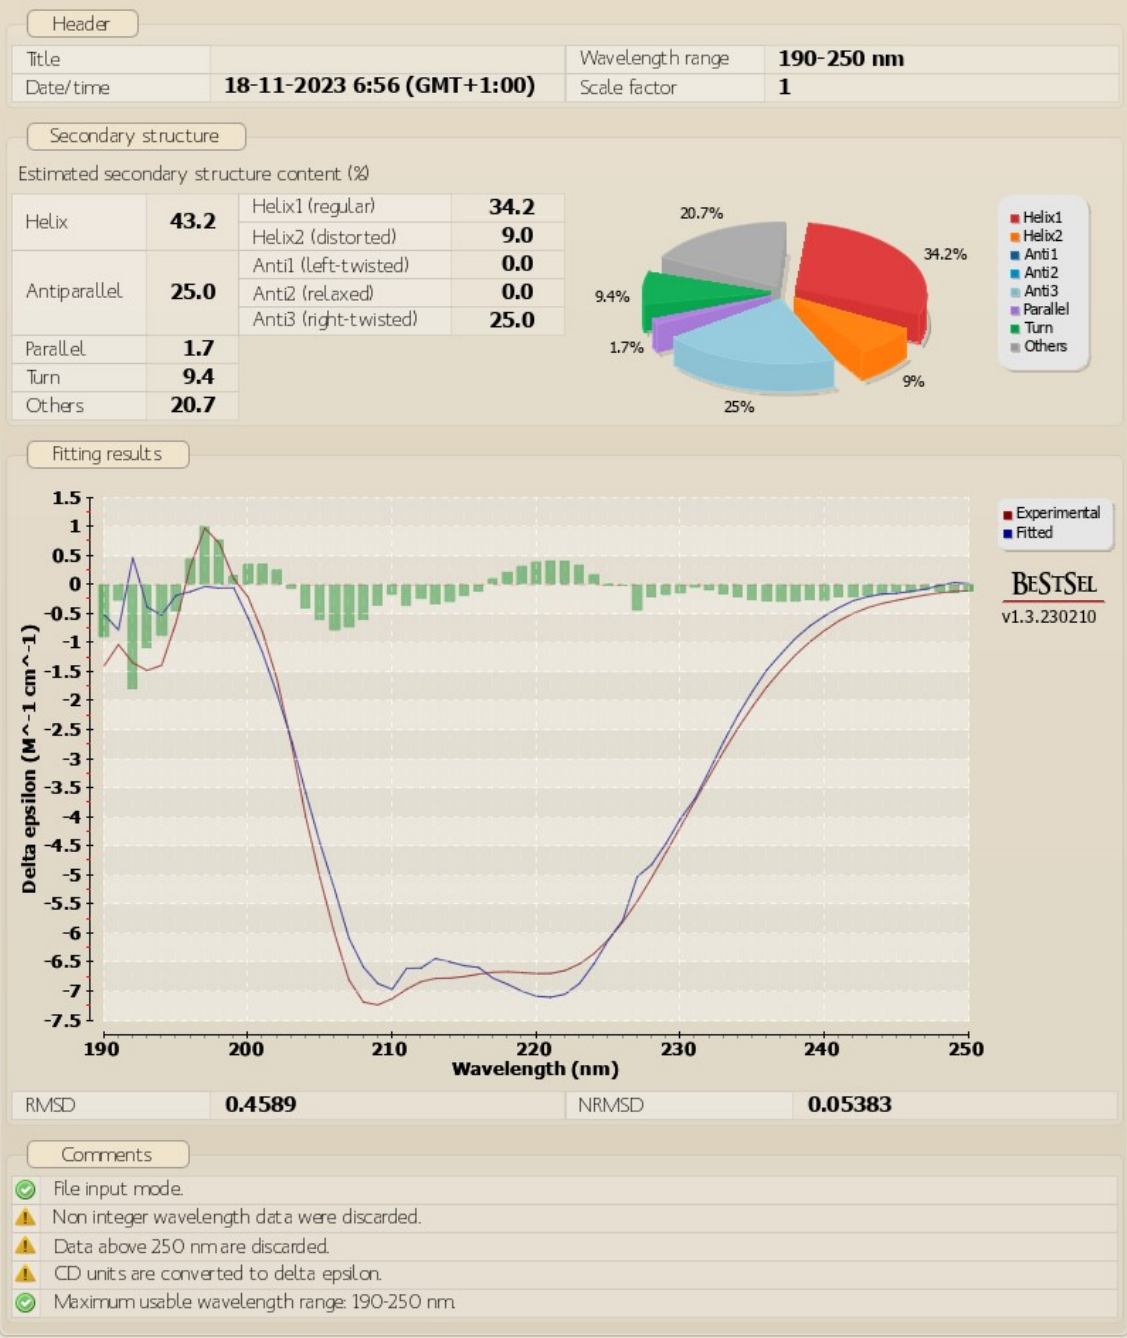

Fig.3 PS interacted HSA

References: Nucleic Acids Res. 50:W90-98 (2022); Nucleic Acids Res. 46:W315-22 (2018); PNAS 11:E3095-103 (2015)

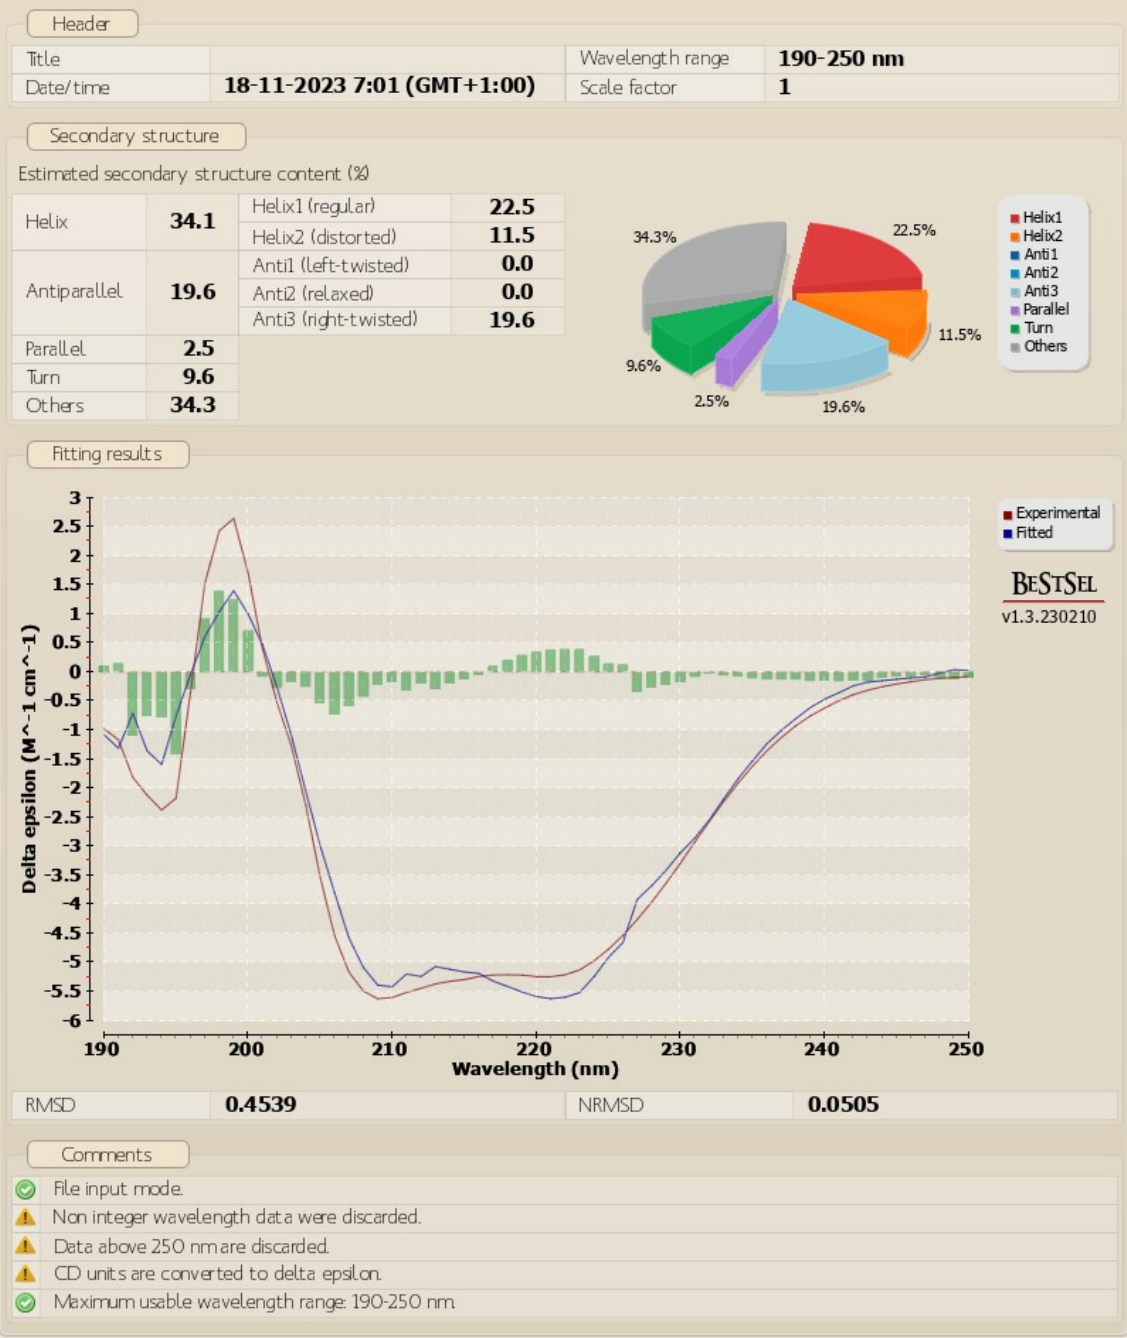

Fig.4 Para interacted HSA



References: Nucleic Acids Res. 50:W90-98 (2022); Nucleic Acids Res. 46:W315-22 (2018); PNAS 11:E3095-103 (2015)

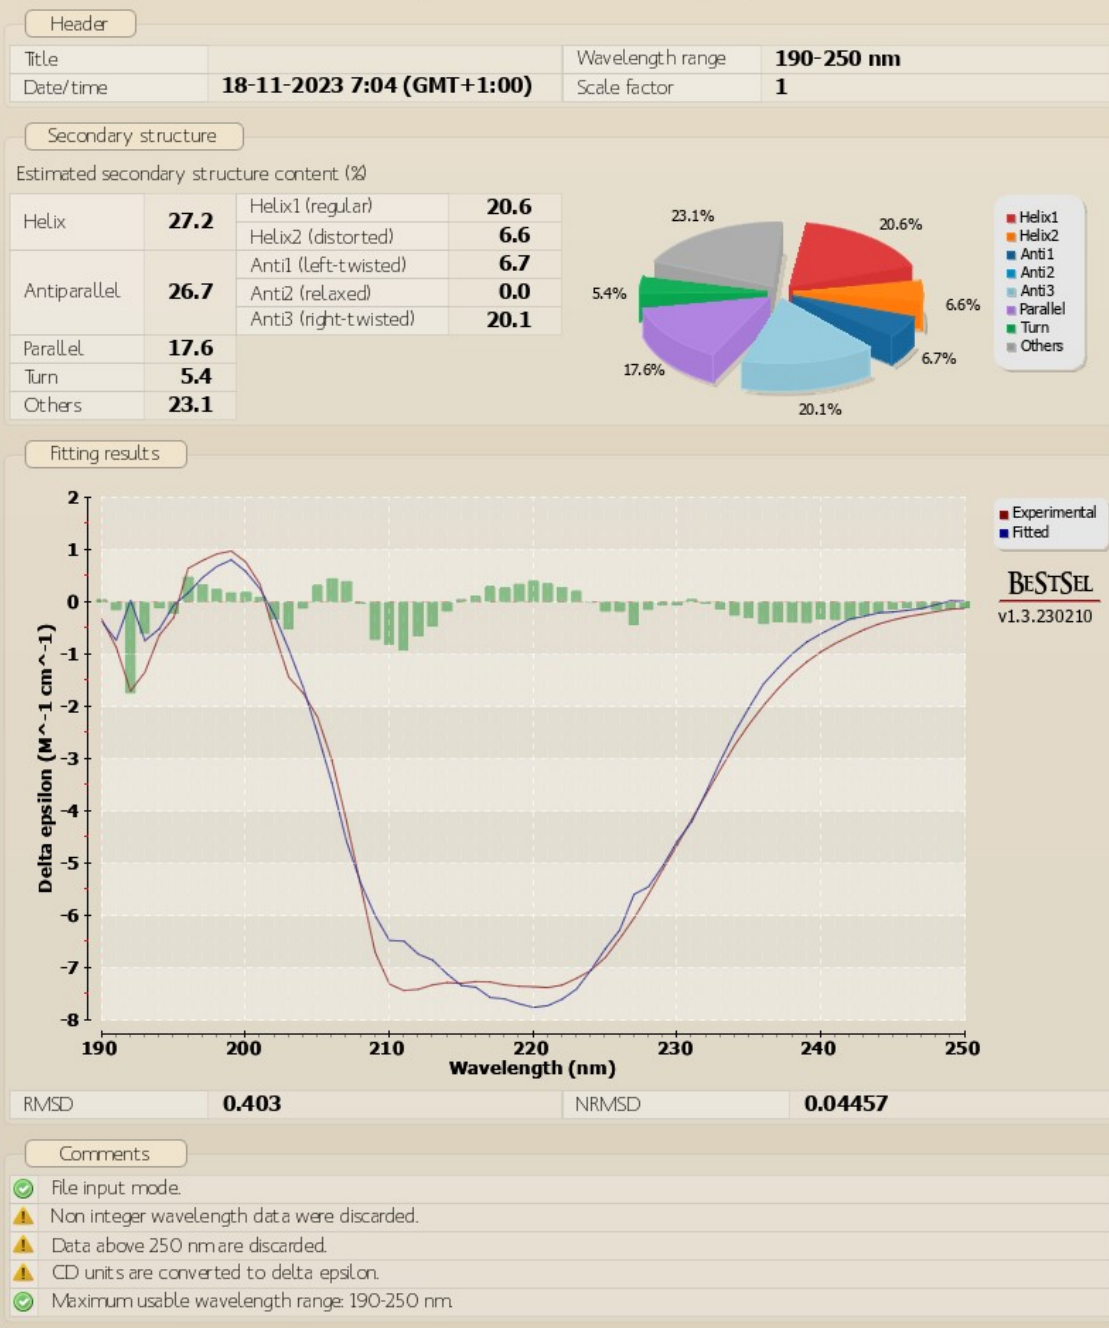

Fig.5 NPS-Paracetamol interacted HSA

# BeStSel secondary structure tabularised

|        | control | PS   | Para | PS Para |
|--------|---------|------|------|---------|
| alpha  |         |      |      |         |
| Helix  | 42.5    | 43.2 | 34.1 | 27.2    |
| beta   |         |      |      |         |
| sheets | 22.1    | 26.7 | 22.1 | 44.3    |
| Turn   | 10      | 9.4  | 9.6  | 5.4     |
| Others | 25.4    | 20.7 | 34.3 | 23.1    |

Table 2. BeStSel predicted HAS secondary structure

## Blind docking result

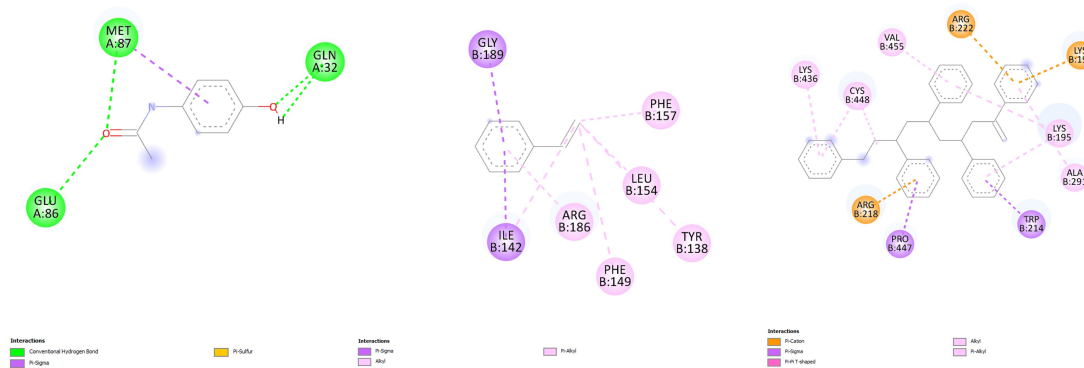

Fig.6 Blind docked

From left to right : paracetamol=-4.90 Kcal/mol, styrene=-4.25 Kcal/mol, pentamer=-7.55 Kcal/mol

## Sudlow site I docked

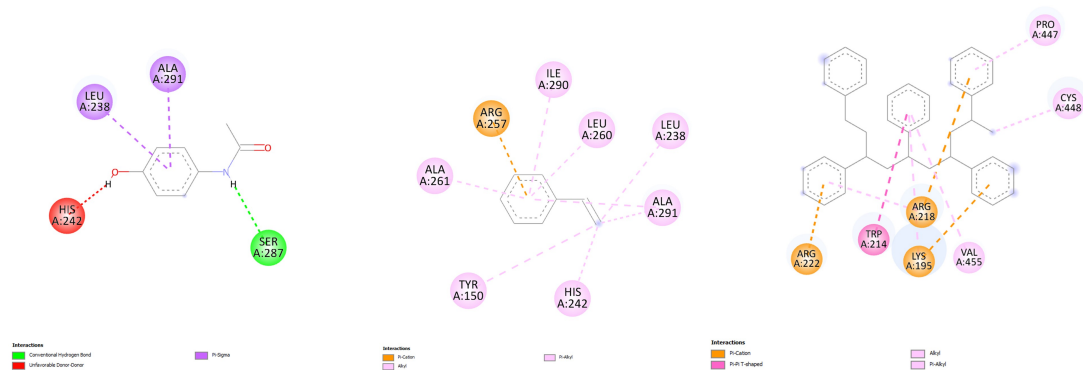

Fig.7 Sudlow site I docked

From left to right: paracetamol=-4.96 Kcal/mol, styrene=-4.25 Kcal/mol, pentamer=-6.46 Kcal/mol

## Sudlow site II docked

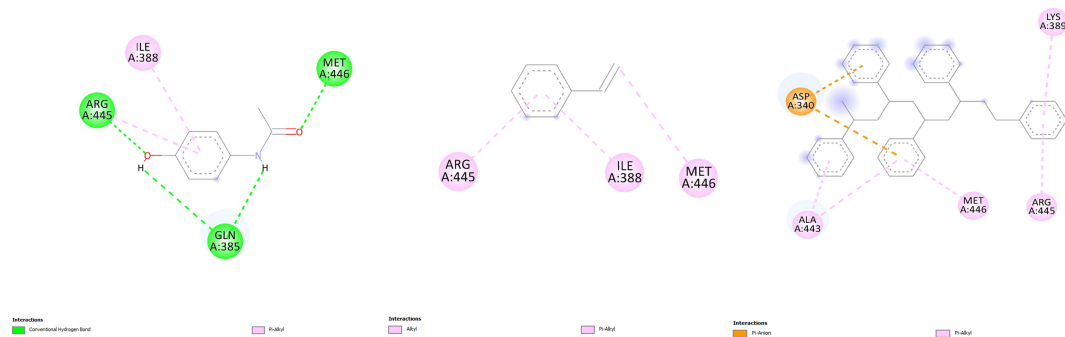



**Fig.8 Sudlow site II docked**

**From left to right: paracetamol=-5.81 Kcal/mol, styrene=-4.36 Kcal/mol, pentamer=-5.81 Kcal/mol**
